# Supplementary material for: Chloroplast SRP54s are Essential for Chloroplast Development in Rice
Source: PubMed Central journal article supplement (PMC7410889; doi:10.1186/s12284-020-00415-2), 2020-08-06
Supplement: 12284_2020_415_MOESM1_ESM.pdf [file 12284_2020_415_MOESM1_ESM.pdf]

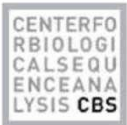

## ChloroP 1.1 Server - prediction results

Technical University of Denmark

---

```
### chlorop v1.1 prediction results #####  
Number of query sequences: 2
```

| Name       | Length | Score | cTP | CS-<br>score | cTP-<br>length |
|------------|--------|-------|-----|--------------|----------------|
| OscpSRP54a | 550    | 0.590 | Y   | 11.938       | 68             |
| OscpSRP54b | 557    | 0.559 | Y   | 11.938       | 73             |

**Supplementary Fig. 1** Subcellular localization prediction of OscpSRP54a and OscpSRP54b using ChloroP program. Chloroplast transit peptides (cTP) were identified in the sequences of OscpSRP54a and OscpSRP54b.

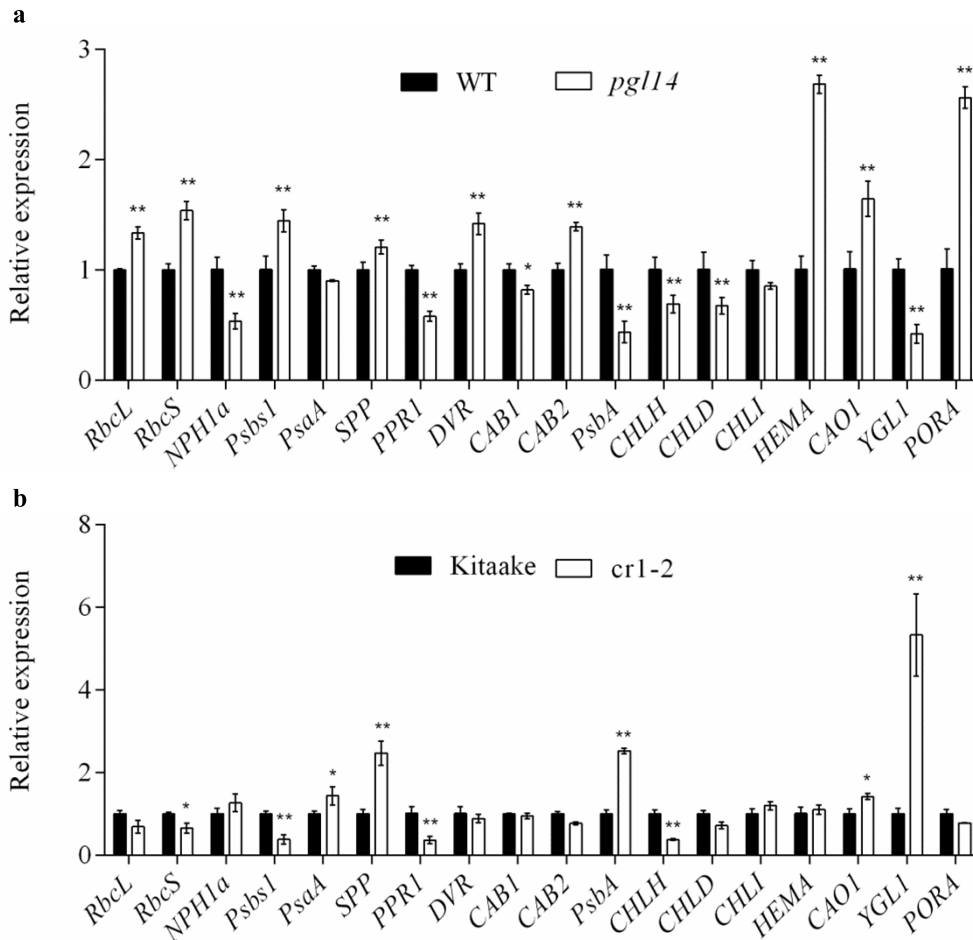

**Supplementary Fig. 2** Expression of genes associated with chlorophyll biosynthesis and chloroplast development.

(a) The expression of genes associated with chlorophyll biosynthesis and chloroplast development in *pgl14* and WT. (b) The expression of genes associated with chlorophyll biosynthesis and chloroplast development in *cr1-2* and wild type Kitaake. The transcript levels of all tested genes are normalized to the levels of *Ubq* (*LOC\_Os03g13170*). The values are means  $\pm$  SD ( $n = 3$ ). \* indicates significance at  $p \leq 0.05$ ; \*\* indicates significance at  $p \leq 0.01$  by Student's *t*-test.

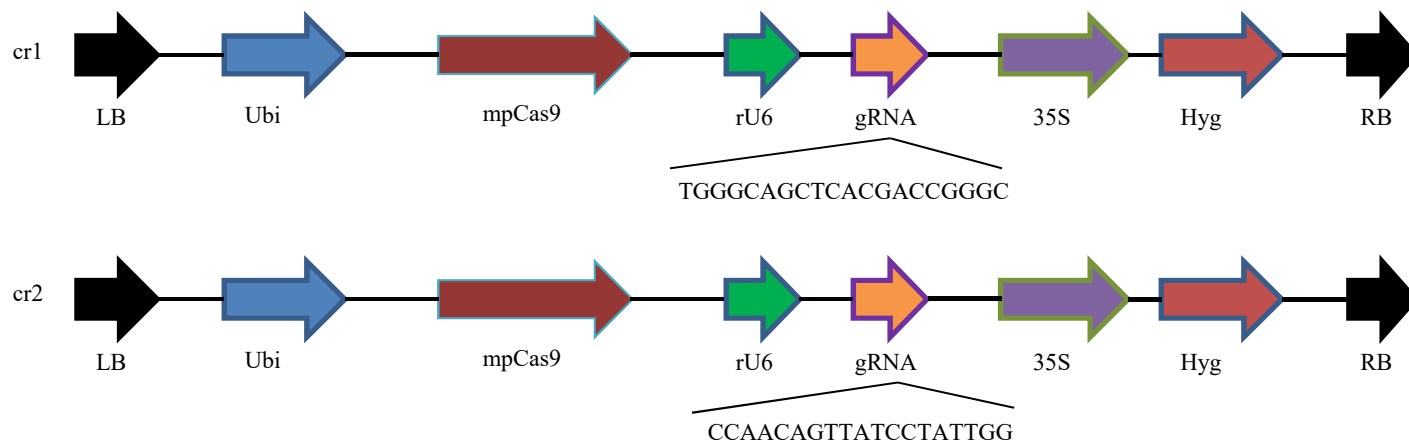

**Supplementary Fig. 3** Schematic structure of cr1 and cr2.

LB, Vector left border; Ubi, Ubi promoter; mpCas9, Cas9 protein; rU6, Rice U6 promoter; gRNA, Guide RNA; 35S, 35S promoter; Hyg, Hygromycin; RB, Vector right border.

Supplementary Table S1 details of SSR markers for fine mapping of *pgl14*

| Markers  | sequence                 |
|----------|--------------------------|
| RM1812F  | CCTACCTCCAGTGAGAGCTAACC  |
| RM1812R  | ACGTGCATTTGTGTGGTTTAGG   |
| RM26092F | GTCATCGTCGTGGTCGCAGTCC   |
| RM26092R | TCTGGAGTGGCGTTGACTGTTGC  |
| RM26076F | CCTTCTCTCTCCCACATCTCTAGC |
| RM26076R | CTAGTGAGTCCCACGTGTCAACC  |
| RM26079F | CTTGACGACCTGACCCAAATACC  |
| RM26079R | GTCAATCGTTAGCCATGTGTTGG  |
| RM26085F | GAGTCCAACCGTGTGTTCTTCC   |
| RM26085R | CCGCTATTACTCCGTCAGTTGG   |

Supplementary Table S2 Primer sequences for vector construction and reverse transcription-PCR

| Primer    | sequence                           |
|-----------|------------------------------------|
| PTsF      | TCGCTCATCGGCAATGGA                 |
| PTsR      | TTCCACGGCATTCTTGTTATT              |
| PQfF      | CGCGGATCCTGGCTCCCCTTGTCAAATAGAT    |
| PQfR      | CGGGGTACCAATACTACCCTGGAAAGAGTGTGTC |
| SLPGL14F  | TCTAGAATGGAGGCCACGGCGCTCAC         |
| SLPGL14R  | GGATCCAGAACTAGGGACTGCATCCAGC       |
| SLCr1F    | TCTAGAATGGAGGCCACCAGTAGTAC         |
| SLCr1R    | GGATCCTCGTCGACGGAAACCGCGCA         |
| BiPGL14F  | GGGGTACCTCATGGAGGCCACGGCGCTCAC     |
| BiPGL14R  | CGGGATCCCAGAACTAGGGACTGCATCCAGC    |
| BiCr1F    | GGGGTACCTCATGGAGGCCACCAGTAGTAC     |
| BiCr1R    | CGGGATCCCTCGTCGACGGAAACCGCGCA      |
| BiCSP41bF | GGGGTACCTCATGGCAGCAACAGCCTCCCT     |
| BiCSP41bR | CGGGATCCCAGCGCTGACGAGCTTCTT        |
| BiW67F    | GGGGTACCTCATGGAGGCTGTCCTACGACA     |
| BiW67R    | TCCCCGGGGCCCGGCGACCGGCGGCGG        |

Supplementary Table S3 Primer sequences for qRT-PCR

| Marker            | Forward sequence       | Reverse sequence          |
|-------------------|------------------------|---------------------------|
| <i>OscpSRP43</i>  | AGAGAACTCCAGCCCTCTCC   | GGACACAATACGGTCCACCT      |
| <i>OscpSRP54a</i> | AAAGAGTTGTATGCTGGTCCG  | TTTGGCTTCTGTTCTTTCT       |
| <i>OscpSRP54b</i> | GATGGAGGAGGAAGAGGGGA   | GCGATGTTGTCCTTCGTCAG      |
| <i>RbcL</i>       | CTTGGCAGCATTCCGAGTAA   | ACAACGGGCTCGATGTGATA      |
| <i>RbcS</i>       | TCCGCTGAGTTTGGCTATTT   | GGACTTGAGCCCTGGAAGG       |
| <i>PsaA</i>       | GCGAGCAAATAAAACACCTTTC | GTACCAGCTTAACGTGGGGAG     |
| <i>SPP</i>        | CGGAGAGGAAACATAATGAC   | ATAGGCATTTGTCTTTGTCTC     |
| <i>NPH1a</i>      | CACTTGCAACCAATGCGTGA   | ATCCGGGAGTTCCTTTGCAG      |
| <i>PPR1</i>       | CTAAGACCGAATGACAAATGC  | GCACTGCCAACAAGAATACC      |
| <i>PsbS1</i>      | CTGAGCCGAAGCCAAAGTTC   | ATCCCCGTCTCCAGGTTTCAG     |
| <i>DVR</i>        | CGAGCCCAGTTCATCAAGGTGC | CCTCCCGATCTTGCCGAACTCC    |
| <i>Cab1</i>       | AGATGGGTTTLAGTGCGACGAG | TTTGGGATCGAGGGAGTATTT     |
| <i>Cab2</i>       | TGTTCTCCATGTTCCGGCTTCT | GCTACGGTCCCCACTTCACT      |
| <i>psbA</i>       | CCCTCATTAGCAGATTCGTTTT | ATGATTGTATTCCAGGCAGAGC    |
| <i>CHLI</i>       | AGTAACCTTGGTGTGTG      | AATCCATCAACATTCAACTCTG    |
| <i>CHLD</i>       | GGAAAGAGAGGGCATTAG     | CAATACGATCAAGTAAGTGTT     |
| <i>CHLH</i>       | CTATACATTCGCCACACT     | TATCACACAACCTCCAAG        |
| <i>HEMA1</i>      | CGCTATTTCTGATGCTATGGGT | TCTTGGGTGATGATTGTTTGG     |
| <i>CAO1</i>       | GATCCATACCCGATCGACAT   | CGAGAGACATCCGGTAGAGC      |
| <i>YGL1</i>       | CAGTCTCCAATGGCCACCT    | TGCTTTCATCAGTGGCTGG       |
| <i>PORA</i>       | TGTACTGGAGCTGGAACAACAA | GAGCACAGCAAAATCCTAGACG    |
| <i>Ubq</i>        | CCCTCCACCTCGTCTCAG     | AGATAACAACGGAAGCATAAAAGTC |
